# Supplementary material for: Room-Temperature Synthesis of Carbon-Nanotube-Interconnected Amorphous NiFe-Layered Double Hydroxides for Boosting Oxygen Evolution Reaction
Source: MDPI journal article supplement (doi:10.3390/molecules28217289), 2023-10-27
Supplement: s1 [file s1]

## Supporting Information

# Room-Temperature Synthesis of Carbon-Nanotube-Interconnected Amorphous NiFe-Layered Double Hydroxides for Boosting Oxygen Evolution Reaction

Zhuo Chen <sup>1,†</sup>, Qiang Qu <sup>1,†</sup>, Xinsheng Li <sup>2</sup>, Katam Srinivas <sup>2</sup>, Yuanfu Chen <sup>2,\*</sup>  
and Mingqiang Zhu <sup>1,\*</sup>

<sup>1</sup> College of Mechanical and Electronic Engineering, Northwest A&F University, Yangling 712100, China

<sup>2</sup> State Key Laboratory of Electronic Thin Films and Integrated Devices, School of Integrated Circuit Science and Engineering, University of Electronic Science and Technology of China, Chengdu 610054, China

\* Correspondence: yfchen@uestc.edu.cn (Y.C.); zmqsx@nwsuaf.edu.cn (M.Z.)

† These authors contributed equally to this work.

## XPS fitting data

The fitted peak data of XPS of NiFe-LDH@CNT are summarized in Table S1.

**Table S1.** The fitted peak data of XPS of NiFe-LDH@CNT

| Elements | Peak<br>(BE)<br>eV |
|----------|--------------------|--------------------|--------------------|--------------------|--------------------|--------------------|--------------------|
| Ni 2p    | 854.99             | 856.40             | 860.80             | 863.46             | 872.52             | 874.68             | 879.03             |
| Fe 2p    | 704.67             | 711.46             | 717.25             | 724.63             | 731.88             |                    |                    |
| C 1s     | 284.00             | 285.17             | 287.29             |                    |                    |                    |                    |

## CV curves for calculating $C_{dl}$

The  $C_{dl}$  data can be calculated from the CV curves. The CV curves of Ni-LDH, Fe-LDH, NiFe-LDH, and NiFe-LDH@CNT are shown in Figure S1.

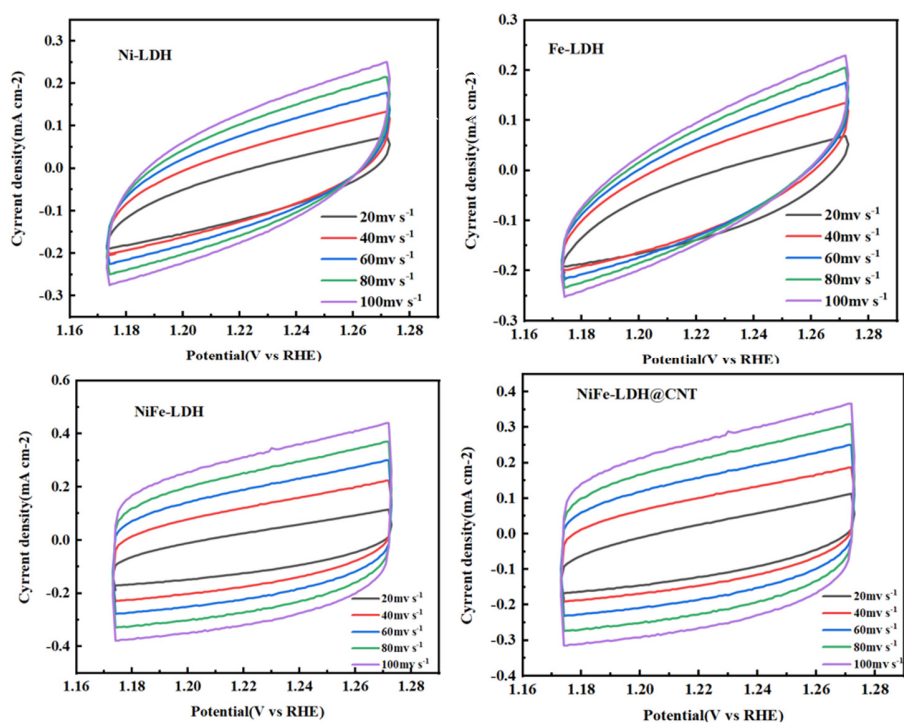

**Figure S1.** Voltammograms of Ni-LDH, Fe-LDH, NiFe-LDH, and NiFe-LDH@CNT for OER in alkaline electrolyte.
